# Supplementary material for: The Small GTPase Rab5c Exerts Bi-Function in Singapore Grouper Iridovirus Infections and Cellular Responses in the Grouper, Epinephelus coioides
Source: PubMed Central journal article supplement (PMC7495150; doi:10.3389/fimmu.2020.02133), 2020-09-02
Supplement: Data_Sheet_1.pdf [file Data_Sheet_1.pdf]

*Supplementary Material*

**The Small GTPase Rab5c Exerts Bi-function in Singapore Grouper  
Iridovirus Infections and Cellular Responses in the Grouper,  
*Epinephelus coioides***

**Liqun Wang<sup>1</sup>, Chen Li<sup>2</sup>, Xinyue Zhang<sup>1</sup>, Min Yang<sup>1</sup>, Shina Wei<sup>1</sup>, Youhua Huang<sup>1</sup>, Qiwei Qin<sup>1,3,4\*\*</sup>, Shaowen Wang<sup>1,3\*</sup>**

<sup>1</sup> Joint Laboratory of Guangdong Province and Hong Kong Region on Marine Bioresource Conservation and Exploitation, College of Marine Sciences, South China Agricultural University, Guangzhou, China

<sup>2</sup> College of Fisheries, Henan Normal University, Xinxiang, China

<sup>3</sup> Guangdong Laboratory for Lingnan Modern Agriculture, Guangzhou, China

<sup>4</sup> Laboratory for Marine Biology and Biotechnology, Qingdao National Laboratory for Marine Science and Technology, Qingdao, China

**\* Correspondence:**

Shaowen Wang

[wangsw@scau.edu.cn](mailto:wangsw@scau.edu.cn)

**\*\*Co-correspondence:**

Qiwei Qin

[qinqw@scau.edu.cn](mailto:qinqw@scau.edu.cn)

**A**

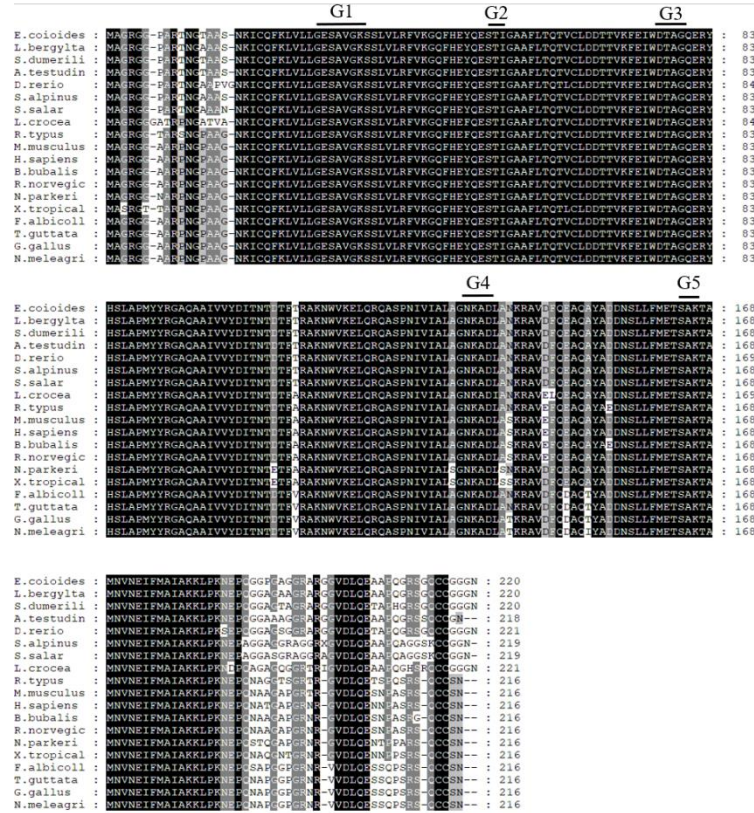

**B**

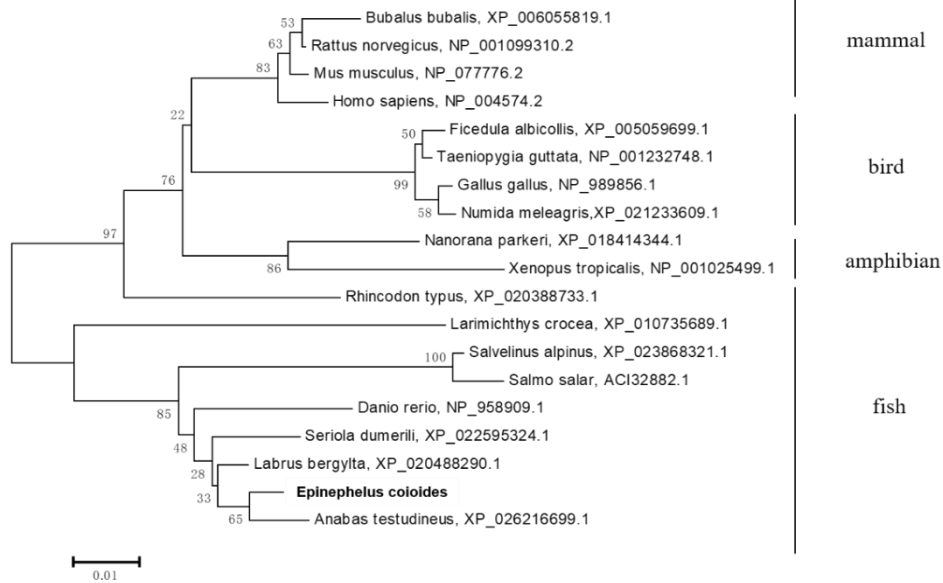

**Supplementary Figure 1.** (A) Amino acid sequence alignments of Rab5c from different species. The conserved domains G1, G2, G3, G4 and G5 were marked above the sequences. (B) Phylogenetic tree of Rab5c proteins. Phylogenetic tree was constructed by the neighbor-joining method using MEGA 6.0 software. The accession number of selected Rab5c sequences were listed on the right of species name.

**Supplementary Table 1** Sequence of primers and si-EcRab5c used in this study

| Name                   | Sequence (5'-3')                          |
|------------------------|-------------------------------------------|
| RT- EcRab5c-F          | GGACAGGAACGGTATCACAG                      |
| RT- EcRab5c-R          | CTCCTTACCCAGTTCTTCG                       |
| RT- Actin-F            | TACGAGCTGCCTGACGGACA                      |
| RT- Actin-R            | GGCTGTGATCTCCTTCTGCA                      |
| RT- ICP18-F            | ATCGGATCTACGTGGTTGG                       |
| RT- ICP18-R            | CCGTGCTCGGTGTCTATTC                       |
| RT- VP49-F             | CCCGCAATGAACTCGCCAAACT                    |
| RT- VP49-R             | CCGTGACGTACTGCCAAGCCTGA                   |
| RT- MCP-F              | GCACGCTTCTCTCACCTTCA                      |
| RT- MCP-R              | AACGGCAACGGGAGCACTA                       |
| EcRab5c-ORF-F          | ATGGCAGGGCGAGGCGGA                        |
| EcRab5c-ORF-R          | GTCCCCGCCCCACAGC                          |
| pEGFP-EcRab5c-F        | GGGGTACCATGGCAGGGCGA                      |
| pEGFP-EcRab5c-R        | CGGGATCCGTTCCCGCCCCACAGC                  |
| pcDNA3.1-EcRab5c-F     | GGGGTACCGAATGGCAGGGCGAGGCGGA              |
| pcDNA3.1-EcRab5c-R     | CGGAATTCGTTCCCGCCCCACAGC                  |
| RT- IFN-F              | ACTGTGTCCTTCCCGAATCATCTGT                 |
| RT- IFN-R              | CAGCCTGCCTGCTTACAACACTGAGAA               |
| RT- IRF-7-F            | CAACACCGGATAACAACCAAG                     |
| RT- IRF-7-R            | GTTCTCAACTGCTACATAGGGC                    |
| RT- ISG15-F            | CCTATGACATCAAAGCTGACGAGAC                 |
| RT- ISG15-R            | GTGCTGTTGGCAGTGACGTTGTAGT                 |
| RT- MyD88-F            | AGCTGGAGCAGACGGAGTG                       |
| RT- MyD88-R            | GAGGCTGAGAGCAAACCTTGGTC                   |
| RT- IFP35-F            | TTCAGATGAGGAGTTCTCTCTTGTG                 |
| RT- IFP35-R            | TCATATCGGTGCTCGTCTACTTTCA                 |
| RT- TRAF6-F            | CCCTATCTGCCTTATGGCTTTGA                   |
| RT- TRAF6-R            | ACAGCGGACAGTTAGCGAGAGTAT                  |
| RT- MDA5-F             | ACCTGGCTCTCAGAATTACGAACA                  |
| RT- MDA5-R             | TCTGCTCCTGGTGGTATTCGTTT                   |
| RT- TNF- $\alpha$ -F   | GTGTCCTGCTGTTTGCTTGGTA                    |
| RT- TNF- $\alpha$ -R   | CAGTGTCCGACTTGATTAGTGCTT                  |
| RT- IL-6-F             | GGTTGGTCCAAGGTGTGCTTA                     |
| RT- IL-6-R             | CTGGGATTGTGCGAGGTCCTT                     |
| RT- IL-1 $\beta$ -F    | AACCTCATCATCGCCACACA                      |
| RT- IL-1 $\beta$ -R    | AGTTGCCTCACAACCGAACAC                     |
| pEGFP-EcRab5c-Q80L-F   | ACTGCAGGACTAGAACGGTATCACAGCTTGGCACCCATGTA |
| pEGFP-EcRab5c-Q80L-R   | ATACCGTTCTAGTCCTGCAGTGTCCCAGATCTCAAACCTTG |
| pEGFP-EcRab5c-S35N-F   | GTGGGGAAGAACAGCTTGGTGCTGCGCTTTGTCAAAGGCCA |
| pEGFP-EcRab5c-S35N-R   | CACCAAGCTGTTCTTCCCCACTGCTGATTCCCCAACAGC   |
| The labeled si-EcRab5c | AGACUGCUAUGAAUGUCAUGAGAU-cy3              |
